# Supplementary material for: Facets control charge separation during photoelectrochemical water oxidation with strontium titanate (SrTiO3) single crystals
Source: Royal Society of Chemistry journal article supplement (doi:10.1039/d3ee04308h), 2024-01-01
Supplement: d3ee04308h1.pdf [file d3ee04308h1.pdf]

## Supporting Information (13 pages)

### Facets Control Charge Separation during Photoelectrochemical Water Oxidation with Strontium Titanate ( $\text{SrTiO}_3$ ) Single Crystals

Samutr Assavachin, Chengcan Xiao, Kathleen Becker, and Frank E. Osterloh\*

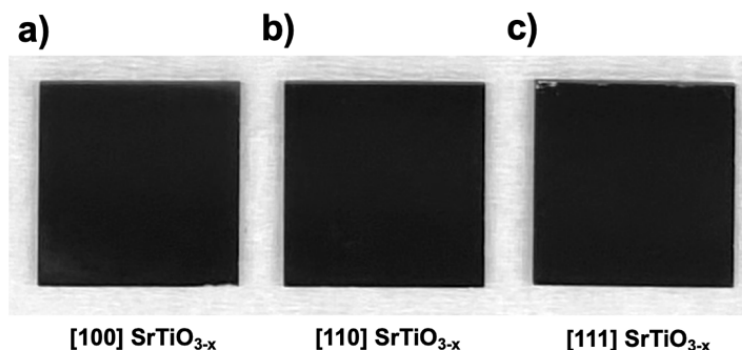

**Figure S1.** Photos of hydrogen-annealed  $\text{SrTiO}_{3-x}$  single crystals with a) (100), b) (110), and c) (111) facets. Crystals are  $1.0 \times 1.0 \text{ cm}^2$  large.

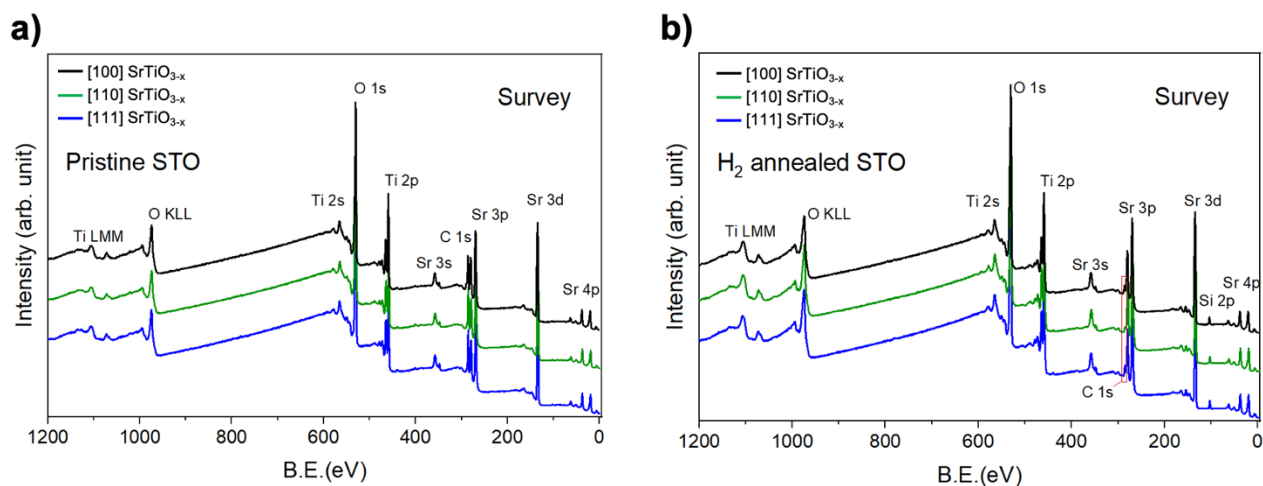

**Figure S2.** Survey scans of (100), (110), and (111) facets of the  $\text{SrTiO}_3$  single crystals before (a) and after (b)  $\text{H}_2$  annealing. A small Si 2p impurity peak at 102 eV is attributed to migration of Si species from the ceramic crucible used for the  $\text{H}_2$  annealing at  $1100^\circ\text{C}$ .

**Table S1.** XPS summary for SrTiO<sub>3</sub> single crystals before and after H<sub>2</sub> annealing.

| O 1s                       | Lattice O                          |           |        | Sr-OH                              |           |                                    | Ti-OH    |           |                                    |          |
|----------------------------|------------------------------------|-----------|--------|------------------------------------|-----------|------------------------------------|----------|-----------|------------------------------------|----------|
|                            | Position                           | Area      | % area | Position                           | Area      | % area                             | Position | Area      | % area                             |          |
| (100) SrTiO <sub>3</sub>   | 529.08                             | 28455.580 | 73.4   | 530.18                             | 1069.289  | 2.8                                | 531.38   | 9233.749  | 23.8                               |          |
| (100) SrTiO <sub>3-x</sub> | 529.28                             | 35511.050 | 58.4   | 530.38                             | 8926.351  | 14.7                               | 531.98   | 16413.640 | 27.0                               |          |
| (110) SrTiO <sub>3</sub>   | 529.02                             | 23034.040 | 66.3   | 530.02                             | 742.980   | 2.1                                | 531.12   | 10969.540 | 31.6                               |          |
| (110) SrTiO <sub>3-x</sub> | 529.24                             | 37989.690 | 61.6   | 530.34                             | 9944.254  | 16.1                               | 531.94   | 13737.490 | 22.3                               |          |
| (111) SrTiO <sub>3</sub>   | 528.90                             | 25127.190 | 70.9   | 530.00                             | 3591.105  | 10.1                               | 531.3    | 6719.895  | 19.0                               |          |
| (111) SrTiO <sub>3-x</sub> | 529.34                             | 34271.930 | 56.3   | 530.34                             | 9944.254  | 19.8                               | 531.94   | 14569.490 | 23.9                               |          |
| Ti 2p                      | Ti <sup>4+</sup> 2p <sub>3/2</sub> |           |        | Ti <sup>4+</sup> 2p <sub>1/2</sub> |           | Ti <sup>3+</sup> 2p <sub>3/2</sub> |          |           | Ti <sup>3+</sup> 2p <sub>1/2</sub> |          |
|                            | Position                           | Area      | % area | Position                           | Area      | Position                           | Area     | % area    | Position                           | Area     |
| (100) SrTiO <sub>3</sub>   | 457.98                             | 18701.270 | -      | 463.68                             | 9350.637  | -                                  | -        | -         | -                                  | -        |
| (100) SrTiO <sub>3-x</sub> | 458.18                             | 25095.470 | 89.2   | 463.98                             | 12547.730 | 456.28                             | 3053.007 | 10.8      | 462.18                             | 1526.504 |
| (110) SrTiO <sub>3</sub>   | 457.92                             | 18364.61  | -      | 463.62                             | 9182.303  | -                                  | -        | -         | -                                  | -        |
| (110) SrTiO <sub>3-x</sub> | 458.24                             | 29828.030 | 91.0   | 464.04                             | 14914.020 | 456.14                             | 2958.796 | 9.0       | 462.24                             | 1479.398 |
| (111) SrTiO <sub>3</sub>   | 457.80                             | 18670.750 | -      | 463.60                             | 9335.377  | -                                  | -        | -         | -                                  | -        |
| (111) SrTiO <sub>3-x</sub> | 458.34                             | 28265.560 | 91.7   | 464.04                             | 14132.780 | 456.24                             | 2565.564 | 8.3       | 462.24                             | 1282.782 |
| Sr 3d                      | Sr 3d <sub>5/2</sub>               |           |        | Sr 3d <sub>3/2</sub>               |           | Surface Sr 3d <sub>5/2</sub>       |          |           | Surface Sr 3d <sub>3/2</sub>       |          |
|                            | Position                           | Area      | % area | Position                           | Area      | Position                           | Area     | % area    | Position                           | Area     |
| (100) SrTiO <sub>3</sub>   | 132.48                             | 20854.110 | -      | 134.28                             | 13902.81  | -                                  | -        | -         | -                                  | -        |
| (100) SrTiO <sub>3-x</sub> | 132.58                             | 21262.600 | 71.7   | 134.38                             | 14175.140 | 133.28                             | 8371.931 | 28.3      | 134.98                             | 5581.315 |
| (110) SrTiO <sub>3</sub>   | 132.48                             | 19748.21  | -      | 134.12                             | 13165.48  | -                                  | -        | -         | -                                  | -        |
| (110) SrTiO <sub>3-x</sub> | 132.74                             | 26611.890 | 80.9   | 134.44                             | 17741.350 | 133.44                             | 6275.025 | 19.1      | 135.14                             | 4183.37  |
| (111) SrTiO <sub>3</sub>   | 132.40                             | 18647.890 | -      | 134.10                             | 12431.990 | -                                  | -        | -         | -                                  | -        |
| (111) SrTiO <sub>3-x</sub> | 132.74                             | 22134.040 | 78.2   | 134.54                             | 14756.100 | 133.54                             | 6187.937 | 21.8      | 135.24                             | 4125.312 |

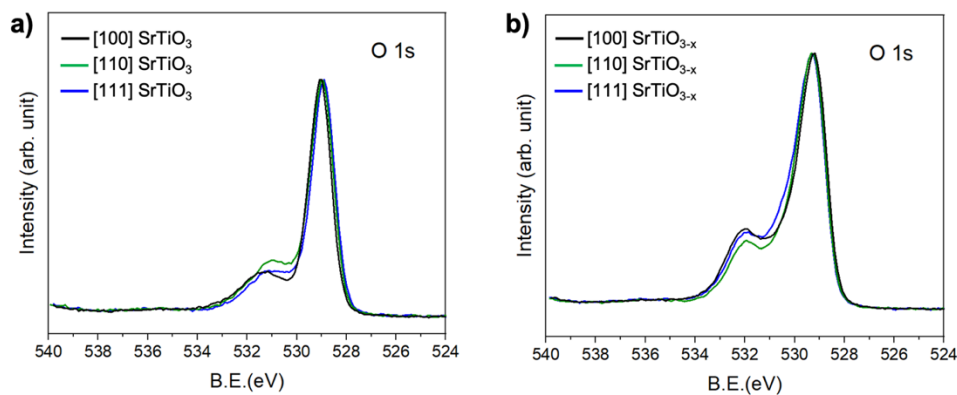

**Figure S3.** Overlapped high resolution O1s region for (100), (110), and (111) facets of  $\text{SrTiO}_3$  single crystal a) before and b) after  $\text{H}_2$  annealing.

5

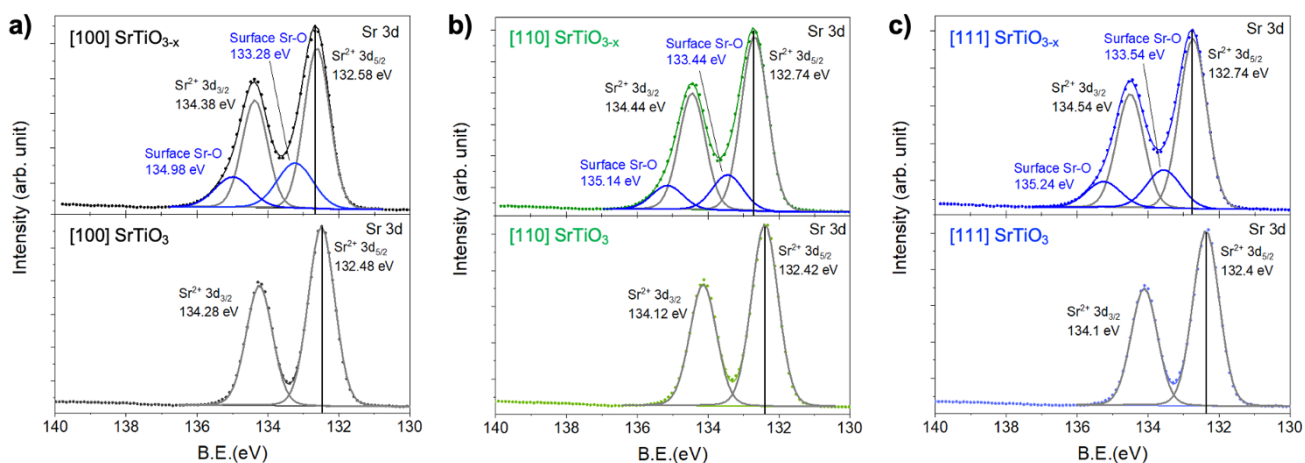

**Figure S4.** Sr 3d peak of a) (100), b) (110), and c) (111) facets of single crystal  $\text{SrTiO}_3$  after (top) and before  $\text{H}_2$  annealing (bottom).

10

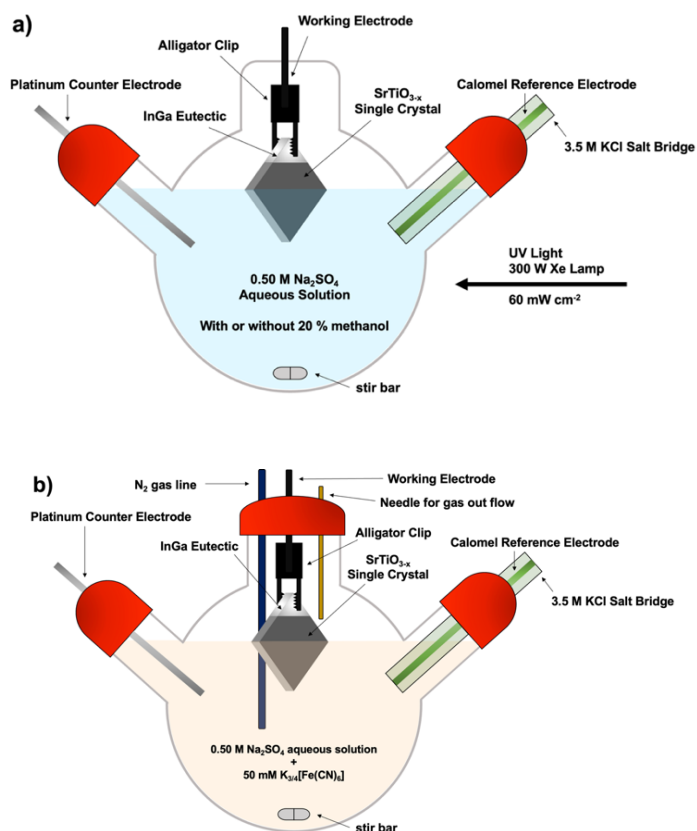

**Figure S5.** a) Three-electrode setup for PEC measurements. The working electrode is a SrTiO<sub>3-x</sub> single crystal with InGa eutectic coating in contact to the stainless steel alligator clip. A 0.50 M Na<sub>2</sub>SO<sub>4</sub> aqueous electrolyte solution (pH = 5.95) exposed to open air is used under constant stirring. UV-light illumination occurs on the front side and is from a 300W Xe lamp with an intensity of 60 mW/cm<sup>2</sup> as measured with a GaN photodetector (220-380 nm). The working electrode area in contact with solution is 1.0 cm<sup>2</sup>. As only the front side responds to illumination (**Figure S10**), the area of 0.50 cm<sup>2</sup> was used to calculate the photocurrent density. b) For Mott-Schottky (MS) measurements the electrolyte is a nitrogen-bubbled 0.50 M Na<sub>2</sub>SO<sub>4</sub> aqueous electrolyte solution (pH = 5.95) with 50 mM equimolar K<sub>3/4</sub>[Fe(CN)<sub>6</sub>]. The solution was purged with N<sub>2</sub> gas for 30 minutes and bubbled with N<sub>2</sub> gas throughout all measurements with constant stirring at 200 rpm. No illumination was applied. The active area of the system is 1.0 cm<sup>2</sup> (both sides of the single crystal are in contact with the solution).

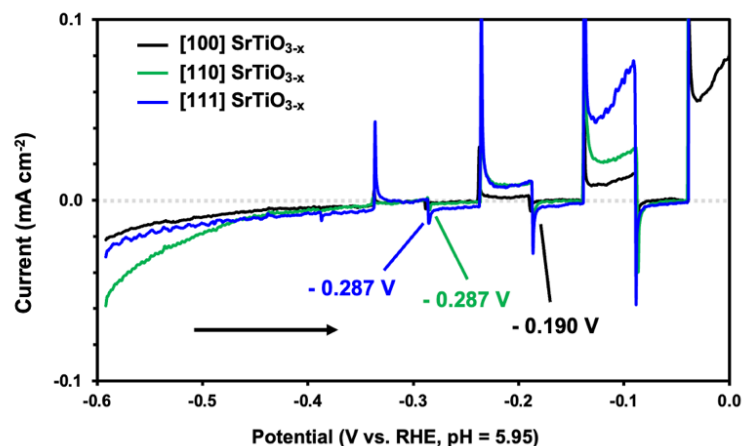

**Figure S6.** Magnified PEC scans for  $\text{SrTiO}_{3-x}$  crystals under UV illumination ( $60 \text{ mW cm}^{-2}$ ) from Xe Lamp in a)  $0.50 \text{ M Na}_2\text{SO}_4$  aqueous solution ( $\text{pH} = 5.95$ ). The scan direction is from negative to positive potential as indicated by the horizontal arrow. The active electrode area is  $0.50 \text{ cm}^2$ . Onset potentials were estimated graphically by interpolation of the photocurrent.

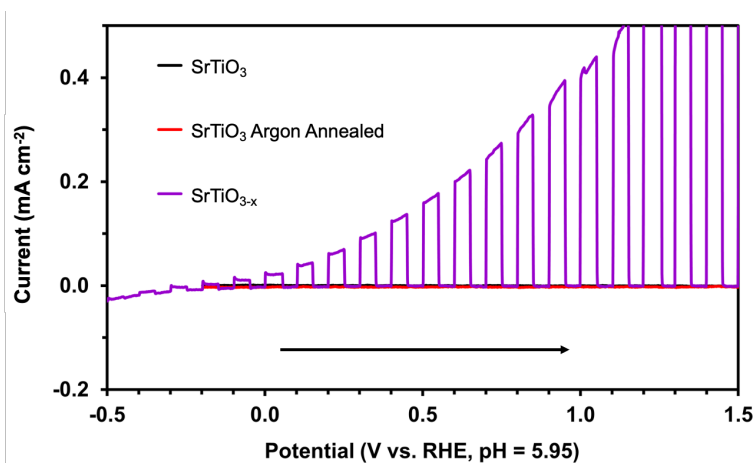

**Figure S7.** PEC scan in  $0.50 \text{ M Na}_2\text{SO}_4$  aqueous solution under  $60 \text{ mW cm}^{-2}$  UV light illumination for as-received, Ar-annealed, and  $\text{H}_2$ -annealed  $\text{SrTiO}_3$  single crystal with (111) exposed facet. The dataset was obtained from one single crystal sample. The sequence of measurements was as follows: 1<sup>st</sup> PEC measurement on the as-received  $\text{SrTiO}_3$  sample. 2<sup>nd</sup> PEC measurement on sample after argon annealing ( $500^\circ\text{C}$ ). 3<sup>rd</sup> PEC measurements on crystal after  $\text{H}_2$  annealing at  $1,110^\circ\text{C}$ . The argon annealing was an attempt to induce the formation of oxygen vacancies, but it was not successful, which is why  $\text{H}_2$  annealing was utilized. The scan direction is from negative to positive potential as indicated by the

horizontal arrow. The active electrode area is 0.50 cm<sup>2</sup>.

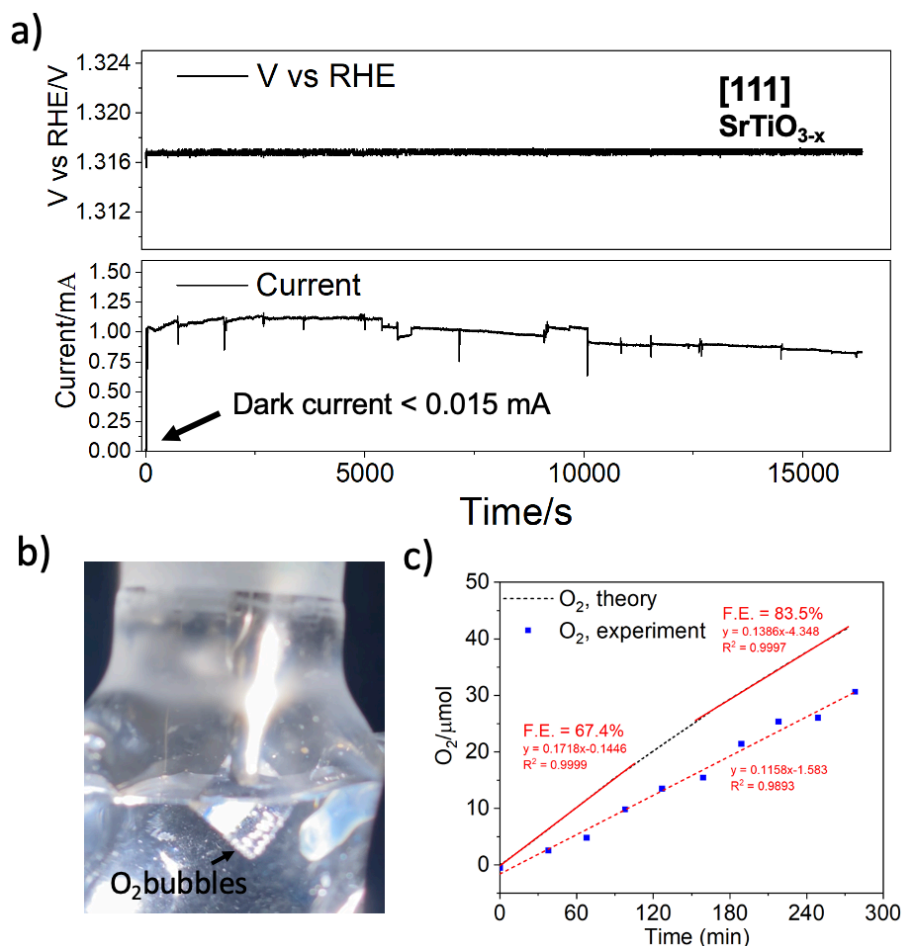

**Figure S8.** a) Chronoamperometry for H<sub>2</sub> annealed (111) SrTiO<sub>3-x</sub> single crystal at 1.33 V vs RHE in 0.50 M Na<sub>2</sub>SO<sub>4</sub> aqueous solution under UV illumination ( $\lambda < 400$  nm, 9 mW cm<sup>-2</sup>) from a Xe Lamp. The active electrode area is 0.50 cm<sup>2</sup>. Photocurrent variations are due to oxygen bubbles, see b) Photo of the working electrode. c) Faraday efficiency measurements (the solid line corresponds to theoretical O<sub>2</sub>) were conducted by separating the counter electrode from the working electrode / reference electrode compartment using a salt bridge filled with aqueous 3.5 M KCl. Before the measurement, the electrolyte in the cell was degassed with argon to remove residual air. During measurement, samples were periodically removed from the headspace with a gas tight syringe, injected into a calibrated gas chromatograph (*Varian*), and quantified using a thermal conductivity detector. The data was adjusted for air contamination using the observed nitrogen contribution from air.

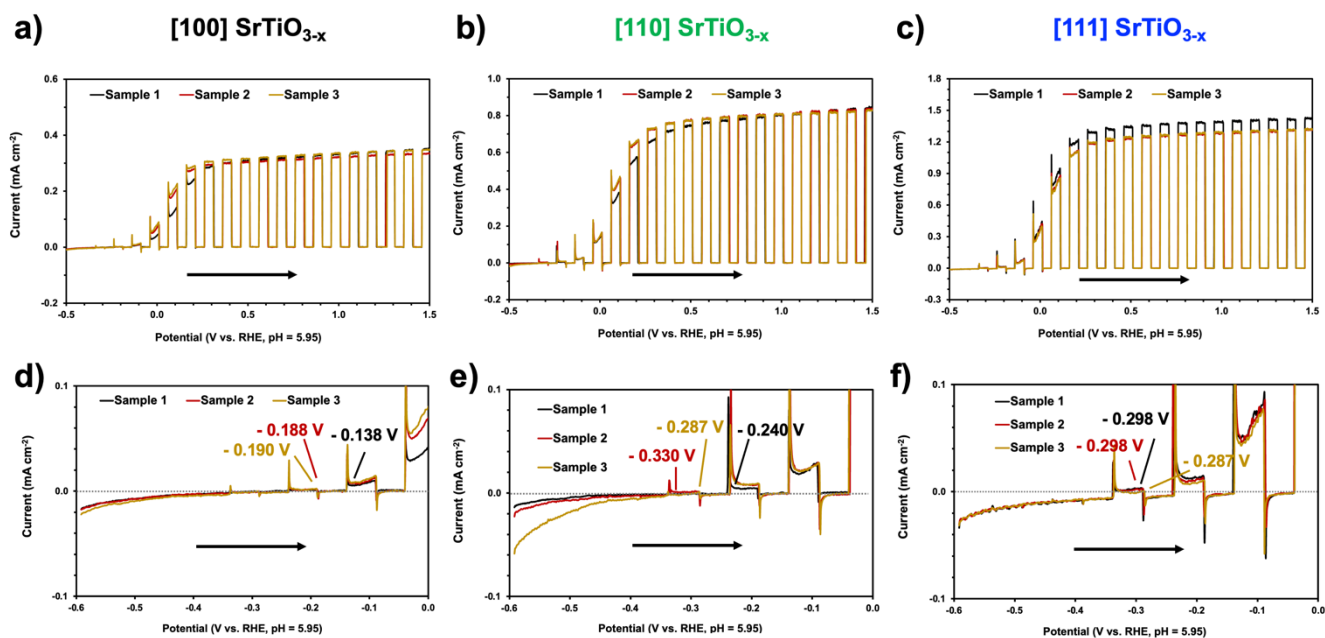

**Figure S9.** PEC for a) (100), b) (110), and c) (111)  $\text{SrTiO}_{3-x}$  single crystals in 0.50 M  $\text{Na}_2\text{SO}_4$  under UV light illumination ( $60 \text{ mW cm}^{-2}$ ) to determine the experimental error. The zoomed in plots reveal the photoonset potential,  $E_{\text{ON}}$ , for d) (100), e) (110), and f) (111)  $\text{SrTiO}_{3-x}$  single crystals. Sample 3 is also featured in **Figure 4**. The scan direction is from negative to positive potential as indicated by the horizontal arrow. The active electrode area is  $0.50 \text{ cm}^2$ .

**Table S2.** Values and errors of photocurrent, photoonset, and photovoltage of three samples of (100, 110, 111) SrTiO<sub>3-x</sub> single crystals with different exposed facets corresponding to the data in **Figure S9**.

| Crystal Orientation                           | (100) SrTiO <sub>3-x</sub> |        |        | (110) SrTiO <sub>3-x</sub> |        |        | (111) SrTiO <sub>3-x</sub> |        |        |
|-----------------------------------------------|----------------------------|--------|--------|----------------------------|--------|--------|----------------------------|--------|--------|
| Sample                                        | 1                          | 2      | 3      | 1                          | 2      | 3      | 1                          | 2      | 3      |
| Current (mA cm <sup>-2</sup> )                | 0.342                      | 0.328  | 0.341  | 0.821                      | 0.823  | 0.814  | 1.413                      | 1.300  | 1.304  |
| Photoonset (V RHE)                            | -0.138                     | -0.188 | -0.190 | -0.240                     | -0.330 | -0.287 | -0.298                     | -0.298 | -0.287 |
| Photovoltage (V)                              | 1.37                       | 1.42   | 1.42   | 1.47                       | 1.56   | 1.52   | 1.53                       | 1.53   | 1.52   |
| Average Current (mA cm <sup>-2</sup> )        | 0.337                      |        |        | 0.819                      |        |        | 1.357                      |        |        |
| Current Standard Deviation (absolute, %)      | 0.01, 2.97                 |        |        | 0.00, 0.00                 |        |        | 0.08, 5.89                 |        |        |
| Average Photoonset (V RHE)                    | -0.172                     |        |        | -0.286                     |        |        | -0.294                     |        |        |
| Photoonset Standard Deviation (absolute, %)   | 0.03, 17.4                 |        |        | 0.05, 17.5                 |        |        | 0.01, 3.40                 |        |        |
| Average Photovoltage (V)                      | 1.40                       |        |        | 1.52                       |        |        | 1.52                       |        |        |
| Photovoltage Standard Deviation (absolute, %) | 0.03, 2.14                 |        |        | 0.05, 3.29                 |        |        | 0.01, 0.65                 |        |        |



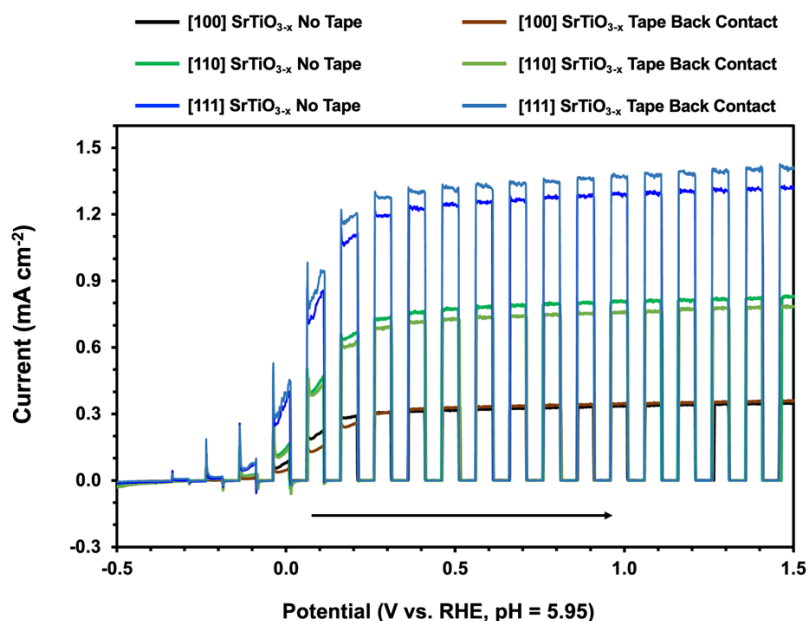

**Figure S10.** PEC of H<sub>2</sub>-annealed SrTiO<sub>3</sub> single crystals to evaluate the effect of polyester tape at the back contact. Conditions: InGa contact, 0.50 M Na<sub>2</sub>SO<sub>4</sub> aqueous solution under UV illumination (60 mW cm<sup>-2</sup>) from Xe lamp. The addition of tape to the crystal back reduces the photocurrent by <10%. As  $\sim$ 90% of the photocurrent is generated at the front side, current density calculations only need to consider the illuminated crystal front side. Scan direction is shown by the horizontal arrow.

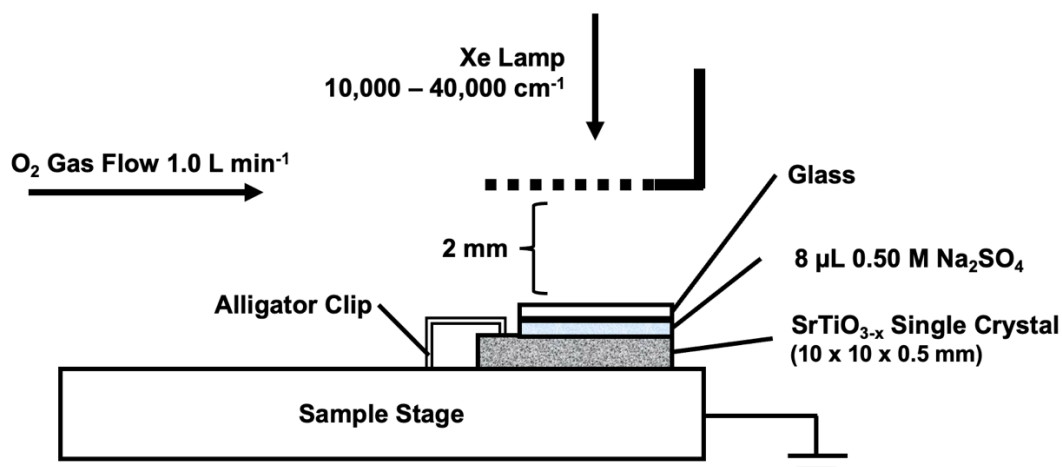

**Figure S11.** Surface photovoltage spectroscopy Measurement configuration.

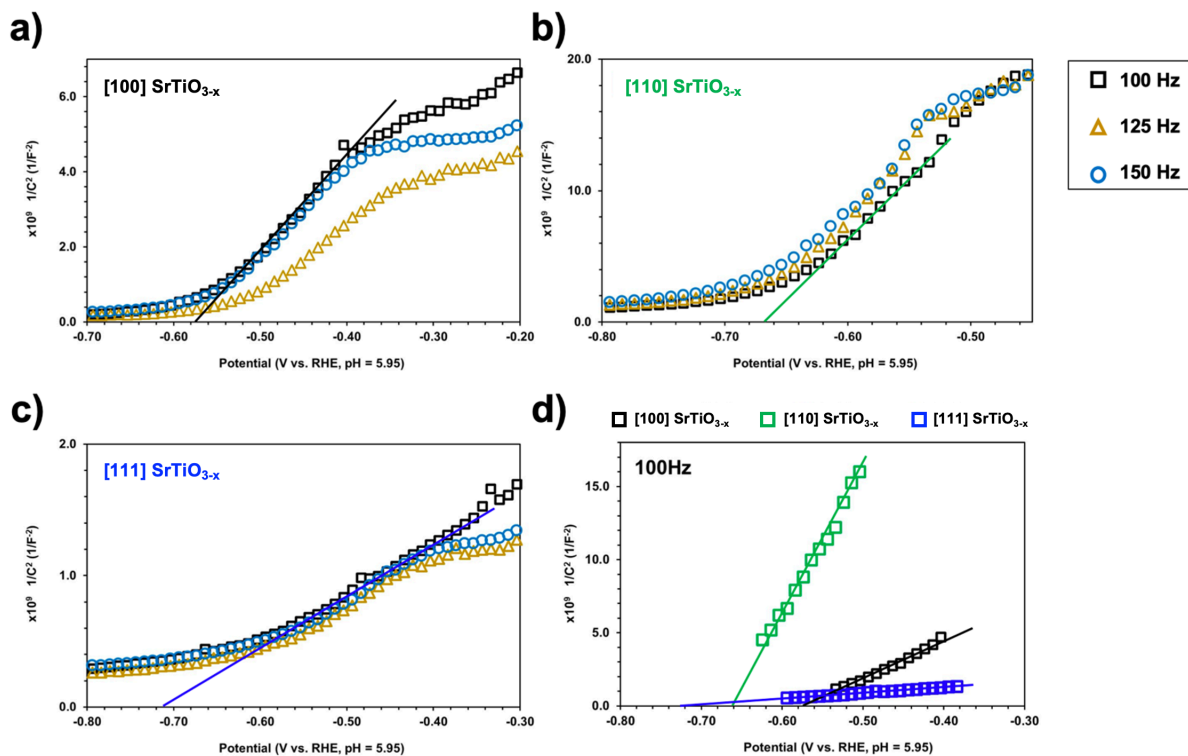

**Figure 12.** Mott Schottky plots at 100, 125, and 150 Hz in 0.50 M Na<sub>2</sub>SO<sub>4</sub> aqueous solution (pH = 5.95) with 50 mM equimolar K<sub>3/4</sub>[Fe(CN)<sub>6</sub>] under constant nitrogen purging without illumination for a) (100) SrTiO<sub>3-x</sub>, b) (110) SrTiO<sub>3-x</sub>, and c) (111) SrTiO<sub>3-x</sub> crystals. The crystal back is coated with InGa eutectic, as shown in **Figure S5b**. d) Comparison of the data at 100 Hz. Numerical values and calculation details are available in **Table S3**.

**Table S3.** Values obtained from Mott Schottky experiment and calculations for free electron density,  $N_D$ , flat band potential,  $E_{FB}$ , and conduction band edge,  $E_{CB}$ .

|                                                                            | (100) SrTiO <sub>3-x</sub>                            |                         |                         | (110) SrTiO <sub>3-x</sub>                            |                         |                         | (111) SrTiO <sub>3-x</sub>                            |                         |                         |
|----------------------------------------------------------------------------|-------------------------------------------------------|-------------------------|-------------------------|-------------------------------------------------------|-------------------------|-------------------------|-------------------------------------------------------|-------------------------|-------------------------|
| <b>Band Gap (eV)</b>                                                       | 3.2                                                   |                         |                         | 3.2                                                   |                         |                         | 3.2                                                   |                         |                         |
| <b>Dielectric Constant (<math>\epsilon</math>)</b>                         | 300                                                   |                         |                         | 300                                                   |                         |                         | 300                                                   |                         |                         |
| <b>Thickness (m)</b>                                                       | 0.0005                                                |                         |                         | 0.0005                                                |                         |                         | 0.0005                                                |                         |                         |
| <b>Area (A / m<sup>2</sup>)</b>                                            | 0.0001                                                |                         |                         | 0.0001                                                |                         |                         | 0.0001                                                |                         |                         |
| <b>Effective Density of States (<math>N_{CB}</math> / cm<sup>-3</sup>)</b> | 8.00 x 10 <sup>20</sup>                               |                         |                         | 8.00 x 10 <sup>20</sup>                               |                         |                         | 8.00 x 10 <sup>20</sup>                               |                         |                         |
| <b>Frequency (Hz)</b>                                                      | 100                                                   | 125                     | 150                     | 100                                                   | 125                     | 150                     | 100                                                   | 125                     | 150                     |
| <b>Potential (x-intercept)</b>                                             | -0.570                                                | -0.542                  | -0.579                  | -0.666                                                | -0.687                  | -0.699                  | -0.725                                                | -0.712                  | -0.720                  |
| <b>Flatband Potential (<math>E_{FB}</math> / V vs RHE)</b>                 | -0.596                                                | -0.567                  | -0.605                  | -0.692                                                | -0.713                  | -0.725                  | -0.751                                                | -0.738                  | -0.745                  |
| <b>Slope (C<sup>-2</sup> x 10<sup>9</sup>)</b>                             | 26.467                                                | 18.233                  | 22.800                  | 96.329                                                | 92.204                  | 86.322                  | 3.831                                                 | 3.615                   | 3.724                   |
| <b>Free Electron Density (<math>N_D</math> / m<sup>-3</sup>)</b>           | 1.78 x 10 <sup>25</sup>                               | 2.58 x 10 <sup>25</sup> | 2.06 x 10 <sup>25</sup> | 4.88 x 10 <sup>24</sup>                               | 5.10 x 10 <sup>24</sup> | 5.44 x 10 <sup>24</sup> | 1.23 x 10 <sup>26</sup>                               | 1.30 x 10 <sup>26</sup> | 1.26 x 10 <sup>26</sup> |
| <b>Free Electron Density (<math>N_D</math> / cm<sup>-3</sup>)</b>          | 1.78 x 10 <sup>19</sup>                               | 2.58 x 10 <sup>19</sup> | 2.06 x 10 <sup>19</sup> | 4.88 x 10 <sup>18</sup>                               | 5.10 x 10 <sup>18</sup> | 5.44 x 10 <sup>18</sup> | 1.23 x 10 <sup>20</sup>                               | 1.30 x 10 <sup>20</sup> | 1.26 x 10 <sup>20</sup> |
| <b>Conduction Band Edge (<math>E_{CB}</math> / V vs RHE)</b>               | -0.69                                                 | -0.66                   | -0.70                   | -0.82                                                 | -0.84                   | -0.85                   | -0.80                                                 | -0.78                   | -0.79                   |
| <b>Valence Band Edge (<math>E_{VB}</math> / V vs RHE)</b>                  | 2.51                                                  | 2.54                    | 2.50                    | 2.38                                                  | 2.36                    | 2.35                    | 2.40                                                  | 2.42                    | 2.41                    |
| <b>Junctions</b>                                                           | SrTiO <sub>3</sub> / O <sub>2</sub> /H <sub>2</sub> O |                         |                         | SrTiO <sub>3</sub> / O <sub>2</sub> /H <sub>2</sub> O |                         |                         | SrTiO <sub>3</sub> / O <sub>2</sub> /H <sub>2</sub> O |                         |                         |
| <b>E<sup>0</sup> (V vs RHE)</b>                                            | 1.23                                                  |                         |                         | 1.23                                                  |                         |                         | 1.23                                                  |                         |                         |
| <b>Built-in Potential, <math>V_{bi}</math> (V)</b>                         | 1.83                                                  | 1.80                    | 1.83                    | 1.92                                                  | 1.94                    | 1.95                    | 1.98                                                  | 1.97                    | 1.97                    |
| <b>Depletion layer width (nm)</b>                                          | 58.0                                                  | 47.8                    | 53.9                    | 114                                                   | 112                     | 108                     | 23.0                                                  | 22.3                    | 22.6                    |

Mott-Schottky measurements were performed using a Gamry Reference 600 Potentiostat at an applied frequency of 100-150 Hz. The space charge capacitance,  $C$ , varies with the applied potential over the depletion layer as determined by the Mott-Schottky equation:

$$\frac{1}{C^2} = \left( \frac{2}{\epsilon \epsilon_0 A^2 e N_D} \right) \left( V - E_{FB} - \frac{k_B T}{e} \right)$$

Here,  $e$  is the electron charge,  $\epsilon$  is the dielectric constant,  $\epsilon_0$  is the permittivity of a vacuum,  $N_D$  is the free electron density,  $V$  is the applied bias,  $E_{FB}$  is the flatband potential,  $k$  is the Boltzmann constant,  $T$  is the temperature, and  $A$  is the surface area of the film in contact with the electrolyte. A plot of  $C^{-2}$  versus  $V$  yields a straight line with a slope that can be used to determine  $N_D$ .

Slope =  $(2/e \epsilon \epsilon_0 N_D A^2)$ ; Given  $\epsilon$  of  $\text{SrTiO}_3 = 300$ ,  $A = 0.0001 \text{ m}^2$ ,  $\epsilon_0 = 8.8541 \times 10^{-12} \text{ C m}^{-1} \text{ V}^{-1}$ , and  $e = 1.60 \times 10^{-19} \text{ C}$ , for (111)  $\text{SrTiO}_{3-x}$  at 100 Hz, the slope =  $3.83 \times 10^9 \text{ C}^{-2} \text{ F}^2$  and the calculated  $N_D$  value of  $1.23 \times 10^{20} \text{ cm}^{-3}$  was obtained. Using the Mott-Schottky equation, the flatband potential is determined from the intercept with the x-axis on the linear plot of  $C^{-2}$  versus  $V$  and converted from SCE to RHE. The x-axis intercept was -0.725 V RHE at pH = 5.95, and therefore  $E_{FB}$  is -0.751 V vs RHE.

The conduction band position,  $E_{CB}$ , is determined from the equation for a n-type semiconductor:  $E_{CB} = E_{FB} + k_B T \times \ln(N_D / N_{CB})$  where the effective density of states,  $N_{CB}$ , for doped  $\text{SrTiO}_3$  was found to be approximately  $8.00 \times 10^{20} \text{ cm}^{-3}$ .<sup>2</sup> Therefore, for (111)  $\text{SrTiO}_{3-x}$  at 100 Hz,  $E_{CB} = -0.80 \text{ V RHE}$ .

Strontium titanate has a band gap value of  $3.2 \text{ eV}$ <sup>3</sup> and the position of the valence band can be determined by adding the bandgap value to the conduction band position,  $E_{CB}$ . The valence band edge is therefore at approximately +2.40 V RHE at pH = 5.95.

The space charge region (SCR), or the depletion layer width,  $w$ , is calculated using the following formula:

$$w = \sqrt{\frac{2\epsilon\epsilon_0 V_{bi}}{eN_D}}$$

Here,  $e$  is the electron charge,  $\epsilon$  is the dielectric constant,  $\epsilon_0$  is the permittivity of a vacuum,  $N_D$  is the free electron density, and  $V_{bi}$  is the built in potential.

## References

1. H. E. Weaver, *Journal of Physics and Chemistry of Solids*, 1959, **11**, 274-277.
2. Q. Wang, T. Hisatomi, Y. Suzuki, Z. Pan, J. Seo, M. Katayama, T. Minegishi, H. Nishiyama, T. Takata, K. Seki, A. Kudo, T. Yamada and K. Domen, *Journal of the American Chemical Society*, 2017, **139**, 1675-  
5 1683.
3. J. G. Mavroides, J. A. Kafalas and D. F. Kolesar, *Appl. Phys. Lett.*, 1976, **28**, 241-243.
